# Supplementary material for: Artichoke (Cynara scolymus L.) water extract alleviates palmitate-induced insulin resistance in HepG2 hepatocytes via the activation of IRS1/PI3K/AKT/FoxO1 and GSK-3β signaling pathway
Source: PubMed Central journal article supplement (PMC10722847; doi:10.1186/s12906-023-04275-3), 2023-12-15

**Artichoke (*Cynara scolymus L.*) water extract alleviates palmitate-induced insulin resistance in HepG2 hepatocytes via the activation of IRS1/PI3K/AKT/FoxO1 and GSK-3 $\beta$  signaling pathway**

Aihua Deng<sup>1</sup>, Yun Wang<sup>1</sup>, Kerui Huang<sup>1</sup>, Peng Xie<sup>1</sup>, Ping Mo<sup>1</sup>, Fengying Liu<sup>1</sup>, Jun Chen<sup>2</sup>, Kaiyi Chen<sup>2</sup>, Yun Wang<sup>3\*</sup>, Bing Xiao<sup>4\*</sup>

**Figure 3A**

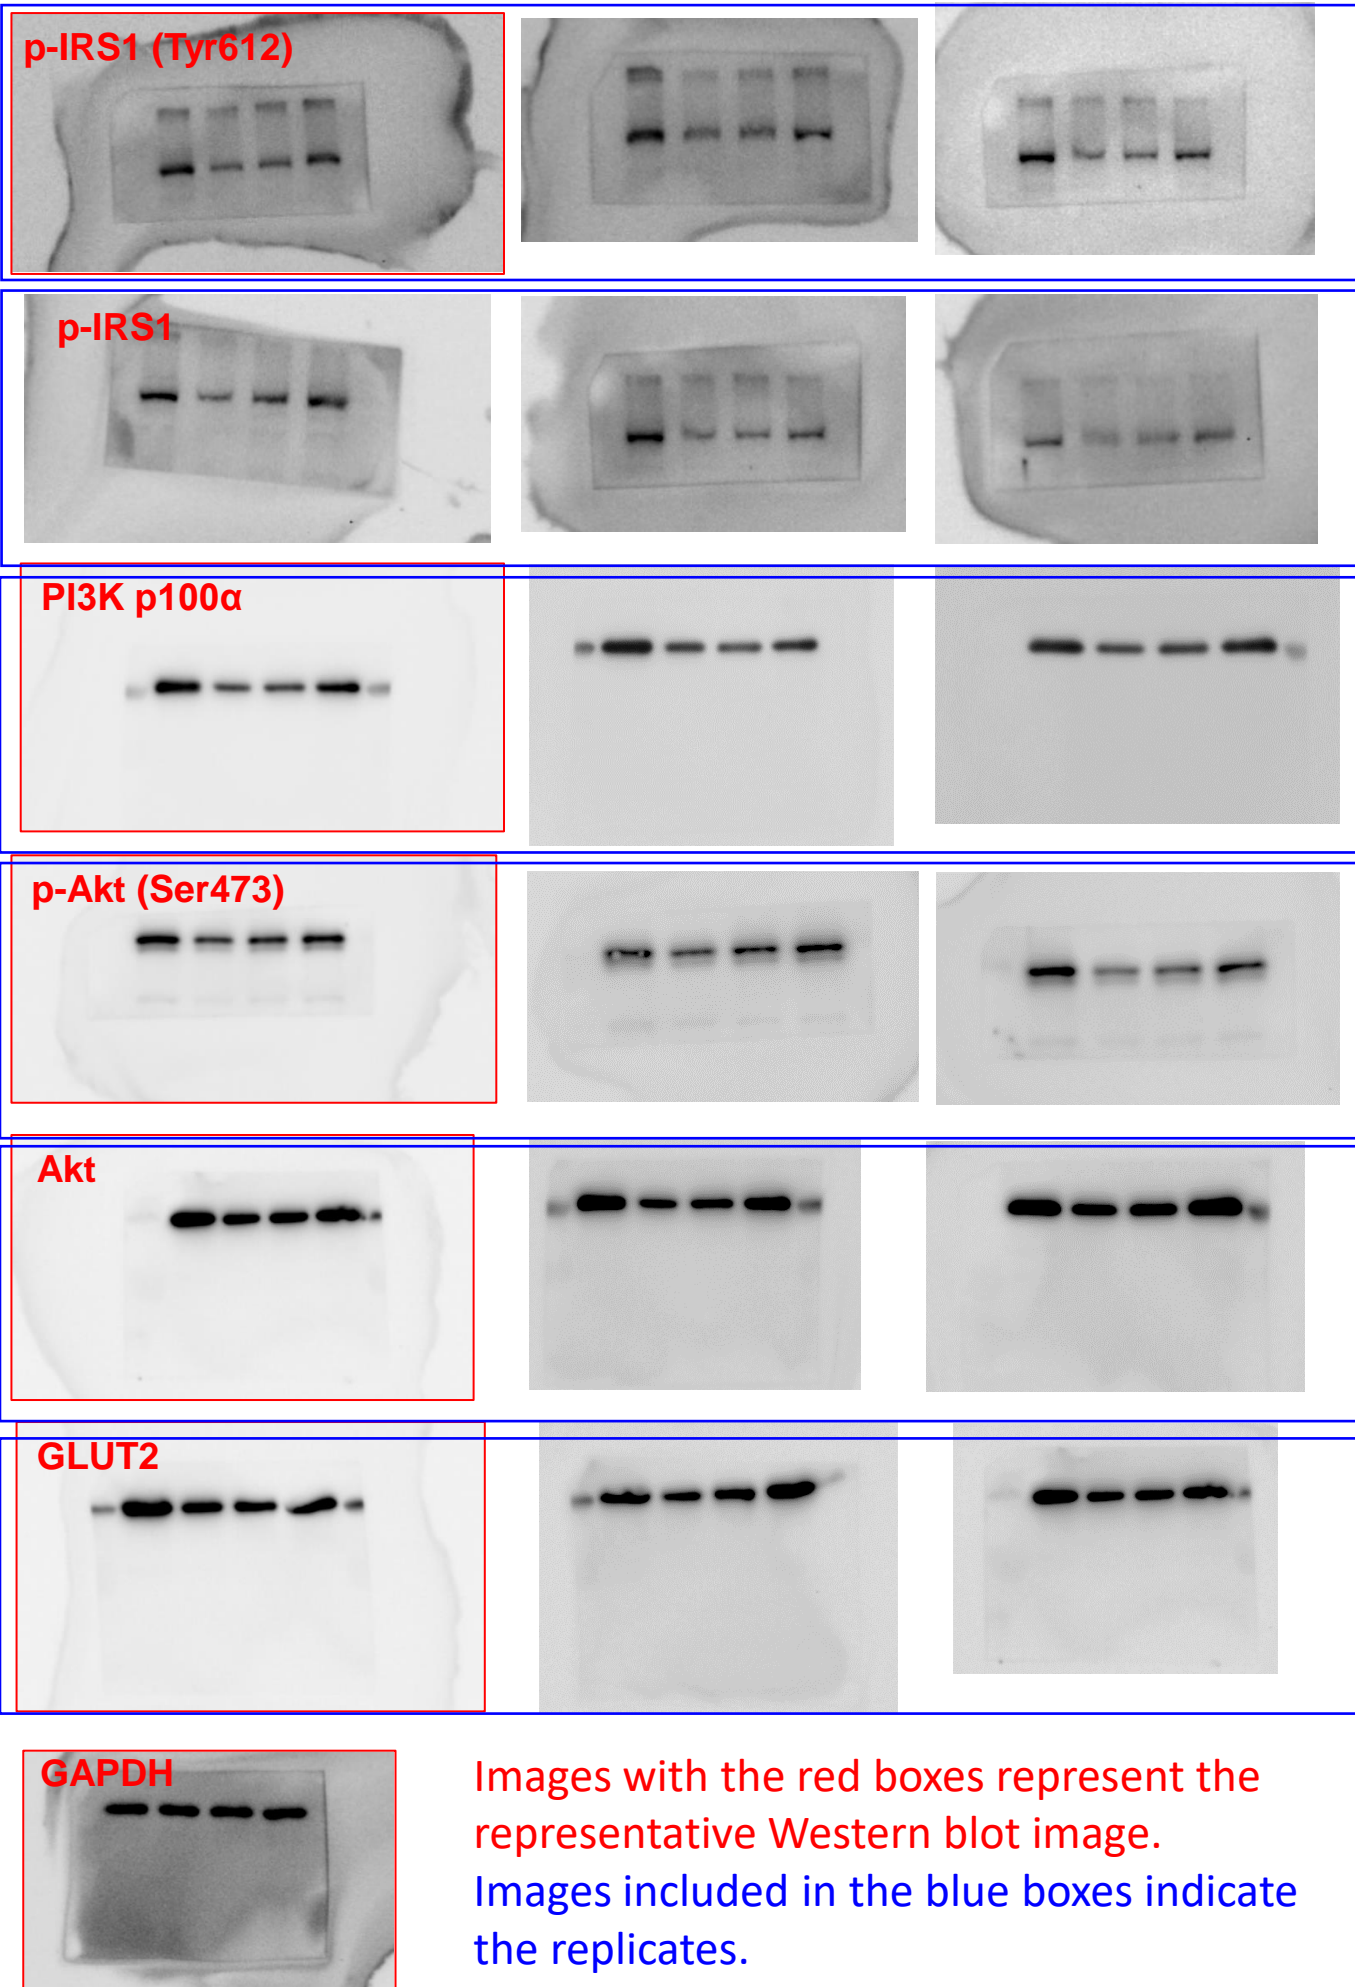

Images with the red boxes represent the representative Western blot image. Images included in the blue boxes indicate the replicates.

**Figure 4A**

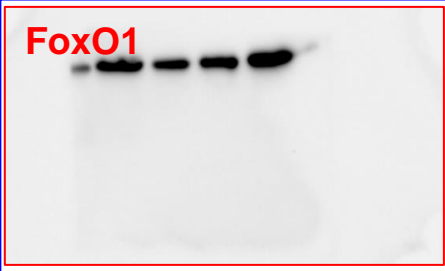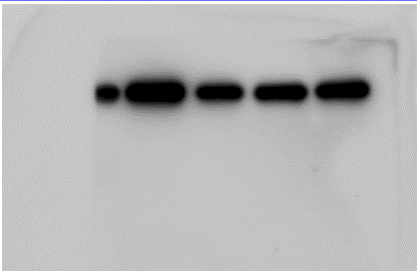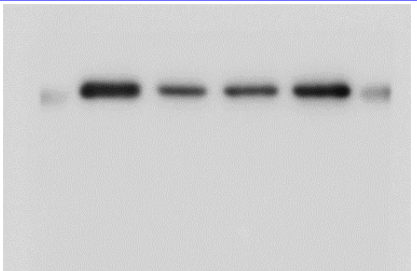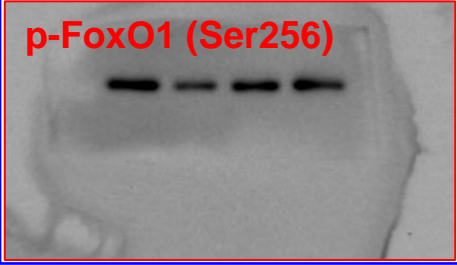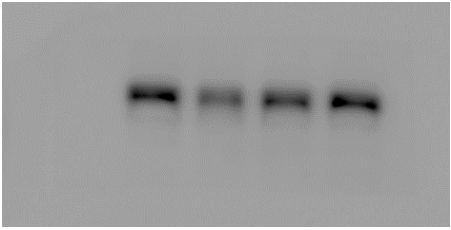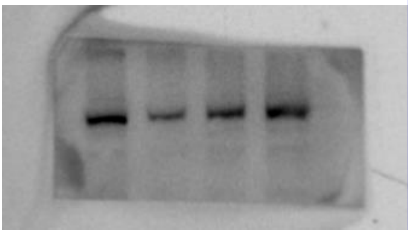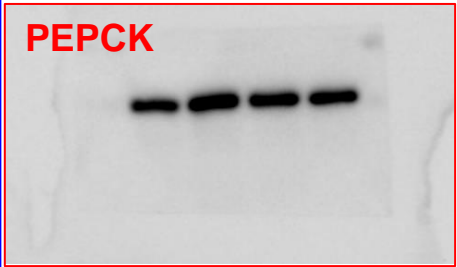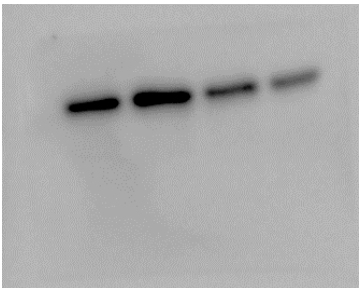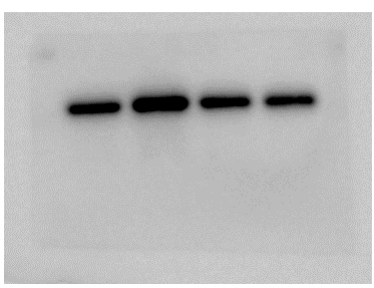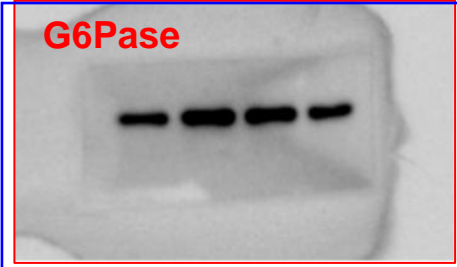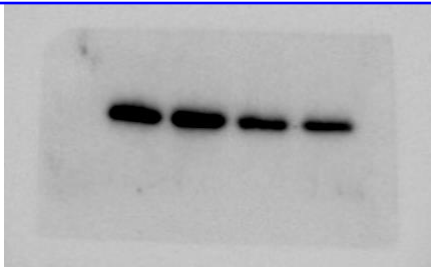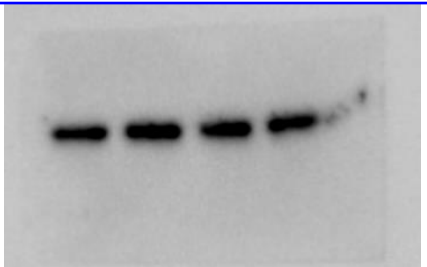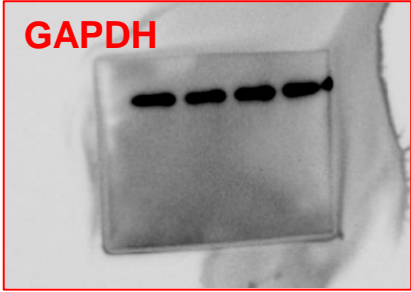

**Figure 5A**

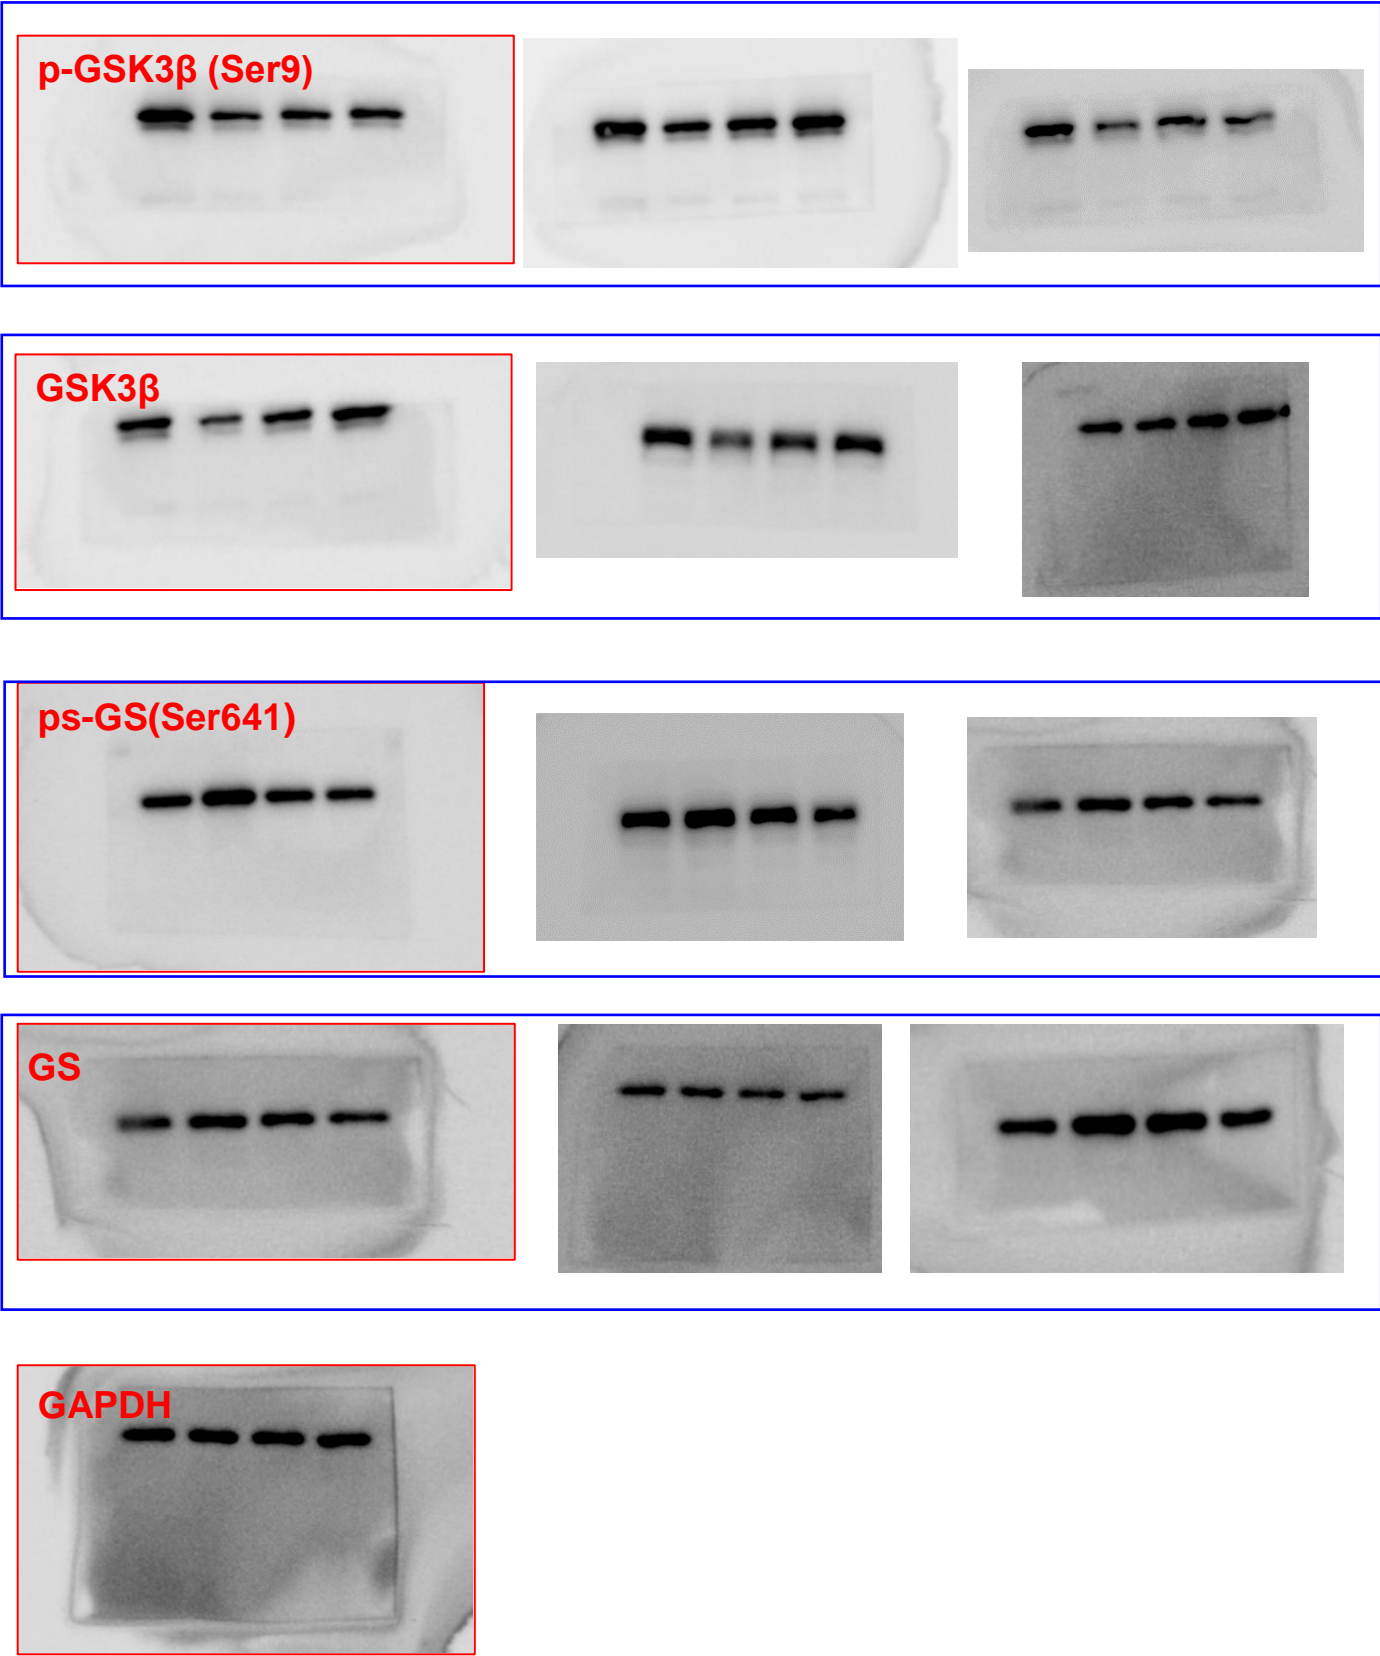

**Figure 6A**

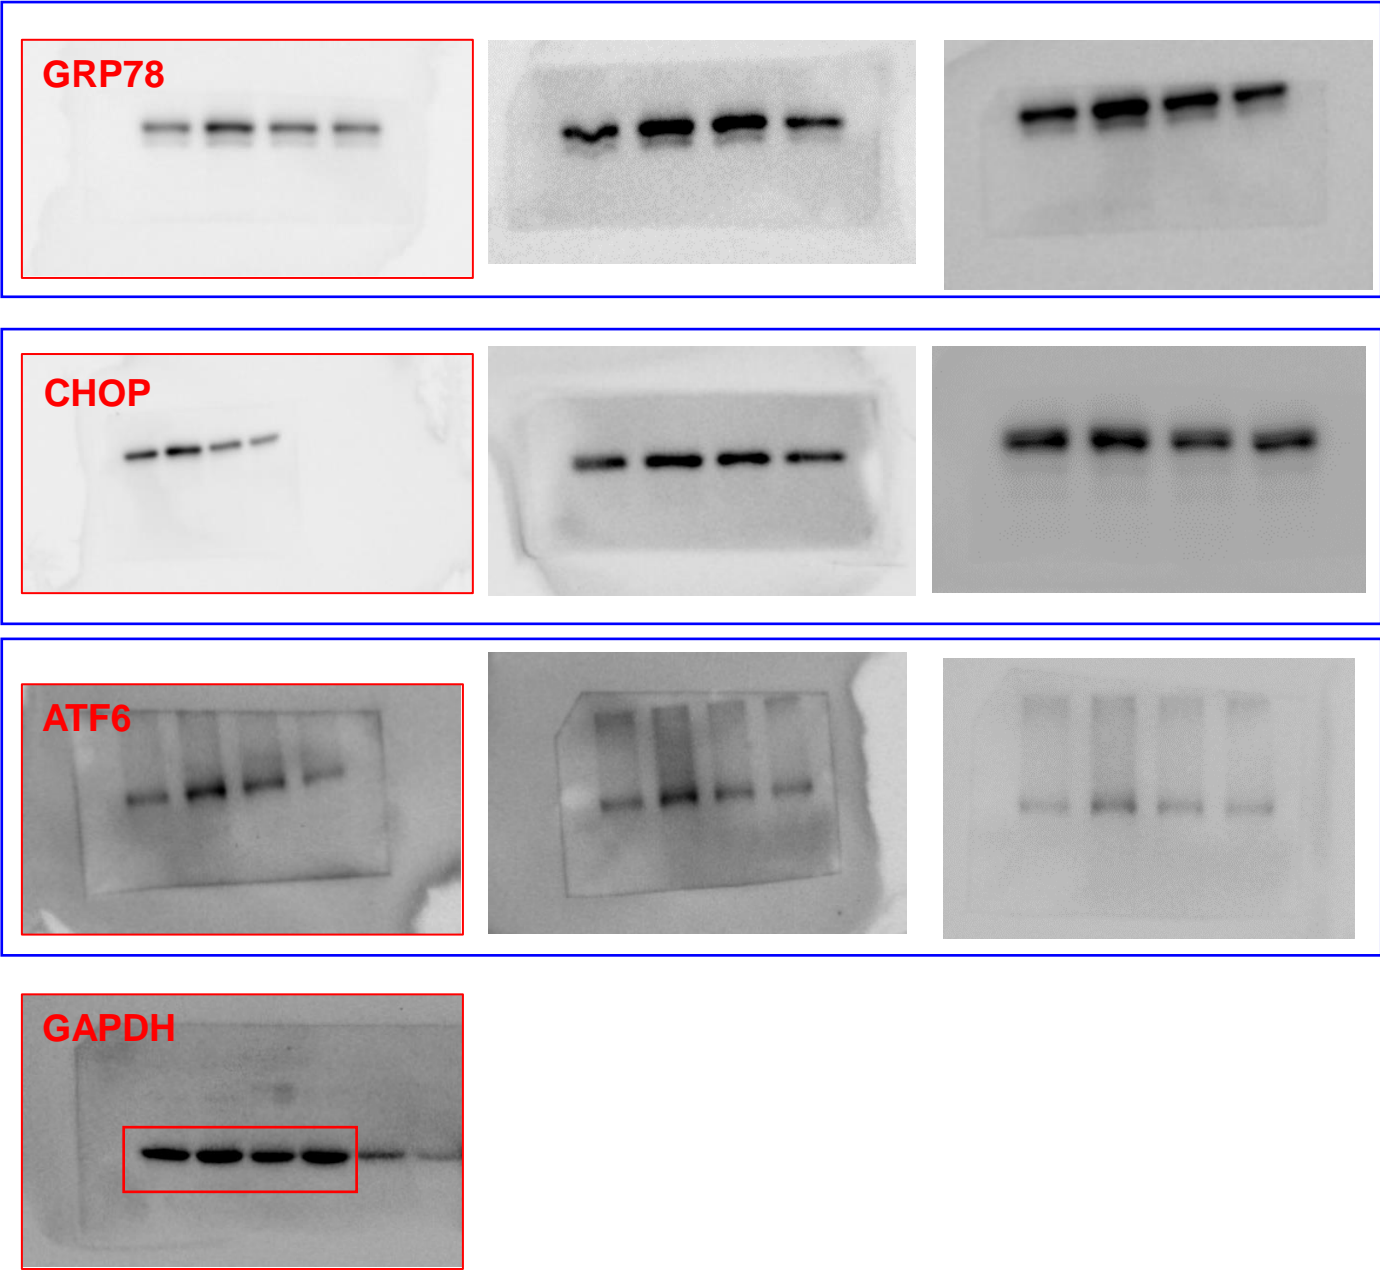

Supplement: 12906_2023_4275_MOESM1_ESM.pdf [file 12906_2023_4275_MOESM1_ESM.pdf]
